# Supplementary material
Source: Springer Nature journal article supplement (https://www.springermedizin.de/resource/supplementary/12933_2012_521_MOESM9_ESM.pdf/9538718)

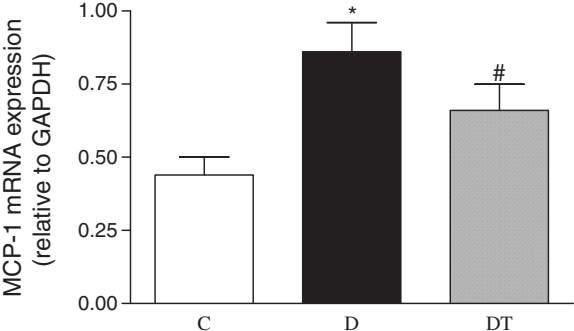

MCP-1

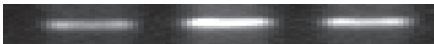

GAPDH

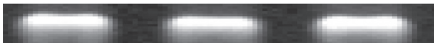

Supplement: MOESM9 [file 9538718]
